# Supplementary material
Source: Springer Nature journal article supplement (https://www.springermedizin.de/resource/supplementary/13063_2011_1108_MOESM3_ESM.pdf/9619668)
Supplement: MOESM3 [file 9619668]

Enugu Urban:  
28 eligible clusters/communities

Udi Local Government Area:  
22 eligible clusters/communities

Randomisation

Implement interventions

3 month lag period  
between  
implementation of  
interventions and  
evaluation

Data collection:  
Documentation of  
implementation process

Expected standard  
practice:  
14 clusters/communities  
50 patients per cluster

Arm 2:  
14 clusters/communities  
50 patients per cluster

Arm 3:  
14 HFs  
50 patients per cluster

Data  
collection:  
Patient exit  
survey,  
provider  
survey,  
malaria test  
register.  
Household  
survey
